# Supplementary material for: High pressure behaviour of the organic semiconductor salt (TTF-BTD)2I3
Source: Royal Society of Chemistry journal article supplement (doi:10.1039/d3cp04220k), 2023-01-01
Supplement: d3cp04220k1.pdf [file d3cp04220k1.pdf]

# Supporting Information for:

## High Pressure Behavior of the Organic Semiconductor Salt (TTF-BTD)<sub>2</sub>I<sub>3</sub>.

*Fabio Montisci,<sup>†,‡</sup> Arianna Lanza,<sup>†</sup> Martin Fisch,<sup>†</sup> Camille Sonnevile,<sup>‡</sup> Yan Geng,<sup>†,∇</sup> Silvio Decurtins,<sup>†</sup> Christian Reber,<sup>‡</sup> Shi-Xia Liu,<sup>\*,†</sup> Piero Macchi<sup>\*,†,§</sup>*

<sup>†</sup>Department of Chemistry, Biochemistry and Pharmaceutical Sciences, University of Bern, Freiestrasse 3, 3012-Bern, Switzerland.

<sup>‡</sup>Département de chimie, Université de Montréal, Montréal QC H3C 3J7, Canada.

<sup>§</sup>Dipartimento di Chimica, Materiali e Ingegneria Chimica “Giulio Natta”, Politecnico di Milano, via Mancinelli 7, I-20131 Milan, Italy.

<sup>‡</sup>Cambridge Crystallographic Data Centre, 12 Union Road, Cambridge CB2 1EZ, United Kingdom.

<sup>∇</sup>College of Chemistry, Chemical Engineering and Material Science, Shandong Normal University, Jinan 250014, P. R. China.

### Table of Contents

|                                                                                            |    |
|--------------------------------------------------------------------------------------------|----|
| Crystallographic coordinates of structures optimized with p-DFT at variable pressure ..... | 2  |
| Band structure and total DOSs plots at variable pressure .....                             | 11 |
| Raman spectra at variable temperature .....                                                | 13 |
| Forces calculated with semi-empirical potential.....                                       | 14 |

# Crystallographic coordinates of structures optimized with p-DFT at variable pressure

## Optimized structure at ambient pressure.

*Unit Cell Parameters:*

| Space Group | a (Å)    | b (Å)   | c (Å)   | $\beta$ (°) |
|-------------|----------|---------|---------|-------------|
| C2/m        | 21.02217 | 9.85707 | 7.12784 | 110.48785   |

*Fractional coordinates of the asymmetric unit:*

| Atom | x         | y         | z         |
|------|-----------|-----------|-----------|
| I    | 0.000000  | -0.500000 | 0.500000  |
| I    | -0.149453 | 0.500000  | 0.387433  |
| S    | -0.114635 | -0.500000 | -0.090222 |
| N    | -0.168593 | -0.371574 | -0.122812 |
| C    | 0.270208  | 0.072980  | -0.156176 |
| C    | 0.209785  | 0.145242  | -0.182627 |
| H    | 0.209254  | 0.254642  | -0.184215 |
| C    | 0.152797  | 0.072507  | -0.200903 |
| S    | 0.074131  | 0.152900  | -0.233042 |
| C    | 0.028112  | 0.000000  | -0.250460 |
| C    | -0.038451 | 0.000000  | -0.270036 |
| S    | -0.085502 | 0.151794  | -0.286897 |
| C    | -0.162777 | 0.067393  | -0.324122 |
| H    | -0.206674 | 0.130499  | -0.346021 |

## Optimized structure at 0.5 GPa.

*Unit Cell Parameters:*

| Space Group | a (Å)    | b (Å)   | c (Å)   | $\beta$ (°) |
|-------------|----------|---------|---------|-------------|
| C2/m        | 21.01066 | 9.81226 | 7.05283 | 111.59780   |

*Fractional coordinates of the asymmetric unit:*

| Atom | x         | y         | z         |
|------|-----------|-----------|-----------|
| I    | 0.000000  | -0.500000 | -0.500000 |
| I    | -0.149122 | -0.500000 | 0.390832  |
| S    | -0.120293 | -0.500000 | -0.091616 |
| N    | -0.174325 | -0.371119 | -0.123505 |
| C    | 0.264249  | 0.073233  | -0.155280 |
| C    | 0.203919  | 0.145770  | -0.179441 |
| H    | 0.203258  | 0.255543  | -0.181769 |
| C    | 0.146832  | 0.072764  | -0.196733 |
| S    | 0.067872  | 0.153410  | -0.230756 |
| C    | 0.021981  | 0.000000  | -0.244847 |

|   |           |          |           |
|---|-----------|----------|-----------|
| C | -0.044816 | 0.000000 | -0.265657 |
| S | -0.092031 | 0.152611 | -0.284217 |
| C | -0.169496 | 0.067617 | -0.320598 |
| H | -0.213462 | 0.131194 | -0.342769 |

### Optimized structure at 1 GPa.

*Unit Cell Parameters:*

| Space Group | a (Å)    | b (Å)   | c (Å)   | $\beta$ (°) |
|-------------|----------|---------|---------|-------------|
| C2/m        | 20.81999 | 9.71651 | 6.97238 | 110.86683   |

*Fractional coordinates of the asymmetric unit:*

| Atom | x         | y         | z         |
|------|-----------|-----------|-----------|
| I    | 0.000000  | -0.500000 | -0.500000 |
| I    | -0.149503 | -0.500000 | 0.394430  |
| S    | -0.116357 | 0.500000  | -0.084257 |
| N    | -0.170929 | -0.369984 | -0.119013 |
| C    | 0.267066  | 0.073900  | -0.154373 |
| C    | 0.206161  | 0.147109  | -0.180543 |
| H    | 0.205533  | 0.257904  | -0.182667 |
| C    | 0.148609  | 0.073480  | -0.198217 |
| S    | 0.069190  | 0.154873  | -0.232104 |
| C    | 0.023128  | 0.000000  | -0.246114 |
| C    | -0.044000 | 0.000000  | -0.265364 |
| S    | -0.091255 | 0.154037  | -0.282407 |
| C    | -0.169331 | 0.068300  | -0.320694 |
| H    | -0.213672 | 0.132508  | -0.344580 |

### Optimized structure at 2 GPa.

*Unit Cell Parameters:*

| Space Group | a (Å)    | b (Å)   | c (Å)   | $\beta$ (°) |
|-------------|----------|---------|---------|-------------|
| C2/m        | 20.57148 | 9.58029 | 6.85686 | 110.20412   |

*Fractional coordinates of the asymmetric unit:*

| Atom | x         | y         | z         |
|------|-----------|-----------|-----------|
| I    | 0.000000  | -0.500000 | -0.500000 |
| I    | -0.150011 | 0.500000  | 0.399315  |
| S    | -0.111465 | 0.500000  | -0.075257 |
| N    | -0.166778 | -0.368380 | -0.113688 |
| C    | 0.270463  | 0.074852  | -0.153981 |
| C    | 0.208813  | 0.149045  | -0.182792 |
| H    | 0.208236  | 0.261312  | -0.184613 |
| C    | 0.150629  | 0.074515  | -0.200942 |
| S    | 0.070557  | 0.156982  | -0.235167 |

|   |           |          |           |
|---|-----------|----------|-----------|
| C | 0.024375  | 0.000000 | -0.248423 |
| C | -0.043120 | 0.000000 | -0.264590 |
| S | -0.090317 | 0.156076 | -0.278668 |
| C | -0.169174 | 0.069291 | -0.318380 |
| H | -0.213962 | 0.134473 | -0.343921 |

### Optimized structure at 5 GPa.

*Unit Cell Parameters:*

| Space Group | a (Å)    | b (Å)   | c (Å)   | $\beta$ (°) |
|-------------|----------|---------|---------|-------------|
| C2/m        | 20.14131 | 9.32806 | 6.62345 | 109.48145   |

*Fractional coordinates of the asymmetric unit:*

| Atom | x         | y         | z         |
|------|-----------|-----------|-----------|
| I    | 0.000000  | 0.500000  | 0.500000  |
| I    | -0.150781 | 0.500000  | 0.404719  |
| S    | -0.104280 | 0.500000  | -0.064313 |
| N    | -0.160884 | -0.365471 | -0.107091 |
| C    | 0.275142  | 0.076610  | -0.154535 |
| C    | 0.212328  | 0.152669  | -0.186585 |
| H    | 0.211795  | 0.267698  | -0.188130 |
| C    | 0.153087  | 0.076448  | -0.204668 |
| S    | 0.071895  | 0.160925  | -0.239895 |
| C    | 0.025606  | 0.000000  | -0.252455 |
| C    | -0.042647 | 0.000000  | -0.264398 |
| S    | -0.089571 | 0.159850  | -0.273354 |
| C    | -0.169775 | 0.071187  | -0.314405 |
| H    | -0.215346 | 0.138211  | -0.342693 |

### Optimized structure at 10 GPa.

*Unit Cell Parameters:*

| Space Group | a (Å)    | b (Å)   | c (Å)   | $\beta$ (°) |
|-------------|----------|---------|---------|-------------|
| C2/m        | 19.77496 | 9.08696 | 6.38014 | 109.86593   |

*Fractional coordinates of the asymmetric unit:*

| Atom | x         | y         | z         |
|------|-----------|-----------|-----------|
| I    | 0.000000  | -0.500000 | 0.500000  |
| I    | -0.151438 | 0.500000  | 0.405733  |
| S    | -0.098466 | 0.500000  | -0.058106 |
| N    | -0.156412 | -0.362789 | -0.103416 |
| C    | 0.278369  | 0.078269  | -0.156884 |
| C    | 0.214619  | 0.156076  | -0.190306 |
| H    | 0.214034  | 0.273740  | -0.191801 |
| C    | 0.154504  | 0.078246  | -0.207111 |

|   |           |          |           |
|---|-----------|----------|-----------|
| S | 0.072307  | 0.164726 | -0.244465 |
| C | 0.026233  | 0.000000 | -0.256279 |
| C | -0.042561 | 0.000000 | -0.263797 |
| S | -0.088837 | 0.163511 | -0.267515 |
| C | -0.170521 | 0.073062 | -0.312299 |
| H | -0.217033 | 0.141692 | -0.345357 |

### Optimized structure at 15 GPa.

*Unit Cell Parameters:*

| Space Group | a (Å)    | b (Å)   | c (Å)   | $\beta$ (°) |
|-------------|----------|---------|---------|-------------|
| C2/m        | 19.57910 | 8.93780 | 6.22841 | 111.59542   |

*Fractional coordinates of the asymmetric unit:*

| Atom | x         | y         | z         |
|------|-----------|-----------|-----------|
| I    | 0.000000  | -0.500000 | 0.500000  |
| I    | -0.152996 | 0.500000  | 0.395366  |
| S    | -0.091294 | 0.500000  | -0.060751 |
| N    | -0.150300 | -0.361289 | -0.107812 |
| C    | 0.283416  | 0.079261  | -0.164966 |
| C    | 0.219223  | 0.158152  | -0.196905 |
| H    | 0.218962  | 0.277435  | -0.195421 |
| C    | 0.158668  | 0.079364  | -0.212185 |
| S    | 0.075647  | 0.167327  | -0.253933 |
| C    | 0.030144  | 0.000000  | -0.262396 |
| C    | -0.038043 | 0.000000  | -0.259604 |
| S    | -0.083379 | 0.165669  | -0.257139 |
| C    | -0.166227 | 0.074251  | -0.304234 |
| H    | -0.213674 | 0.143418  | -0.340459 |

### Optimized structure at 20 GPa.

*Unit Cell Parameters:*

| Space Group | a (Å)    | b (Å)   | c (Å)   | $\beta$ (°) |
|-------------|----------|---------|---------|-------------|
| C2/m        | 19.35933 | 8.79453 | 6.06648 | 111.19424   |

*Fractional coordinates of the asymmetric unit:*

| Atom | x         | y         | z         |
|------|-----------|-----------|-----------|
| I    | 0.000000  | -0.500000 | -0.500000 |
| I    | -0.152958 | 0.500000  | 0.397303  |
| S    | -0.089918 | 0.500000  | -0.058501 |
| N    | -0.149573 | -0.359728 | -0.104948 |
| C    | 0.283586  | 0.080203  | -0.165036 |
| C    | 0.219084  | 0.160076  | -0.196844 |
| H    | 0.218823  | 0.280898  | -0.195671 |

|   |           |          |           |
|---|-----------|----------|-----------|
| C | 0.158118  | 0.080351 | -0.210458 |
| S | 0.074705  | 0.169690 | -0.253697 |
| C | 0.029241  | 0.000000 | -0.265023 |
| C | -0.039360 | 0.000000 | -0.260275 |
| S | -0.084315 | 0.167872 | -0.256974 |
| C | -0.167811 | 0.075451 | -0.306334 |
| H | -0.215735 | 0.145445 | -0.345355 |

### Optimized structure at 30 GPa.

*Unit Cell Parameters:*

| Space Group | a (Å)    | b (Å)   | c (Å)   | $\beta$ (°) |
|-------------|----------|---------|---------|-------------|
| C2/m        | 18.93607 | 8.56209 | 5.79845 | 109.43095   |

*Fractional coordinates of the asymmetric unit:*

| Atom | x         | y         | z         |
|------|-----------|-----------|-----------|
| I    | 0.000000  | 0.500000  | -0.500000 |
| I    | -0.152691 | -0.500000 | 0.403676  |
| S    | -0.087804 | -0.500000 | -0.051403 |
| N    | -0.148775 | -0.357163 | -0.095941 |
| C    | 0.283553  | 0.081615  | -0.162030 |
| C    | 0.218414  | 0.162934  | -0.194561 |
| H    | 0.217961  | 0.286313  | -0.195558 |
| C    | 0.156589  | 0.081716  | -0.204922 |
| S    | 0.072483  | 0.173664  | -0.249111 |
| C    | 0.026833  | 0.000000  | -0.271302 |
| C    | -0.043043 | 0.000000  | -0.264580 |
| S    | -0.087569 | 0.171232  | -0.262228 |
| C    | -0.171972 | 0.077604  | -0.314854 |
| H    | -0.220257 | 0.149623  | -0.356320 |

### Optimized structure at 40 GPa.

*Unit Cell Parameters:*

| Space Group | a (Å)    | b (Å)   | c (Å)   | $\beta$ (°) |
|-------------|----------|---------|---------|-------------|
| C2/m        | 18.61084 | 8.39486 | 5.61531 | 108.57679   |

*Fractional coordinates of the asymmetric unit:*

| Atom | x         | y         | z         |
|------|-----------|-----------|-----------|
| I    | 0.000000  | -0.500000 | -0.500000 |
| I    | -0.152727 | 0.500000  | 0.408744  |
| S    | -0.085523 | 0.500000  | -0.045227 |
| N    | -0.147684 | -0.355531 | -0.088320 |
| C    | 0.283770  | 0.082486  | -0.161154 |
| C    | 0.218037  | 0.164770  | -0.194555 |

|   |           |          |           |
|---|-----------|----------|-----------|
| H | 0.217510  | 0.289993 | -0.194876 |
| C | 0.155412  | 0.082670 | -0.204149 |
| S | 0.070745  | 0.176657 | -0.248508 |
| C | 0.025155  | 0.000000 | -0.277157 |
| C | -0.045378 | 0.000000 | -0.267028 |
| S | -0.089360 | 0.173742 | -0.263488 |
| C | -0.174531 | 0.079166 | -0.317608 |
| H | -0.223059 | 0.152952 | -0.360033 |

### Optimized structure at 50 GPa.

*Unit Cell Parameters:*

| Space Group | a (Å)    | b (Å)   | c (Å)   | $\beta$ (°) |
|-------------|----------|---------|---------|-------------|
| C2/m        | 18.39798 | 8.27628 | 5.48321 | 110.50030   |

*Fractional coordinates of the asymmetric unit:*

| Atom | x         | y         | z         |
|------|-----------|-----------|-----------|
| I    | 0.000000  | -0.500000 | -0.500000 |
| I    | -0.152552 | 0.500000  | 0.423020  |
| S    | -0.082097 | 0.500000  | -0.034392 |
| N    | -0.145042 | -0.353785 | -0.071620 |
| C    | 0.284483  | 0.082805  | -0.155527 |
| C    | 0.217731  | 0.165261  | -0.194429 |
| H    | 0.216648  | 0.291650  | -0.199400 |
| C    | 0.154303  | 0.082972  | -0.202594 |
| S    | 0.069158  | 0.179992  | -0.250475 |
| C    | 0.016914  | 0.000000  | -0.352174 |
| C    | -0.044464 | 0.000000  | -0.256592 |
| S    | -0.088324 | 0.172899  | -0.251831 |
| C    | -0.175354 | 0.080518  | -0.317259 |
| H    | -0.224139 | 0.156310  | -0.355196 |

### Optimized structure at 60 GPa.

*Unit Cell Parameters:*

| Space Group | a (Å)    | b (Å)   | c (Å)   | $\beta$ (°) |
|-------------|----------|---------|---------|-------------|
| C2/m        | 18.21680 | 8.16931 | 5.36529 | 110.39657   |

*Fractional coordinates of the asymmetric unit:*

| Atom | x         | y         | z         |
|------|-----------|-----------|-----------|
| I    | 0.000000  | 0.500000  | 0.500000  |
| I    | -0.152963 | -0.500000 | 0.425170  |
| S    | -0.080543 | -0.500000 | -0.033372 |
| N    | -0.144177 | -0.353015 | -0.066269 |
| C    | 0.284884  | 0.083374  | -0.156137 |

|   |           |          |           |
|---|-----------|----------|-----------|
| C | 0.217845  | 0.166557 | -0.195448 |
| H | 0.216877  | 0.294086 | -0.200348 |
| C | 0.154247  | 0.083687 | -0.201383 |
| S | 0.068892  | 0.182048 | -0.252288 |
| C | 0.017231  | 0.000000 | -0.351080 |
| C | -0.043449 | 0.000000 | -0.249071 |
| S | -0.087959 | 0.174765 | -0.249816 |
| C | -0.175513 | 0.081526 | -0.318439 |
| H | -0.224510 | 0.158261 | -0.356270 |

**Optimized structure at 40 GPa (relaxed from 50 GPa structure).**

*Unit Cell Parameters:*

| Space Group | a (Å)    | b (Å)   | c (Å)   | $\beta$ (°) |
|-------------|----------|---------|---------|-------------|
| C2/m        | 18.60771 | 8.40213 | 5.62087 | 110.55451   |

*Fractional coordinates of the asymmetric unit:*

| Atom | x         | y         | z         |
|------|-----------|-----------|-----------|
| I    | 0.000000  | -0.500000 | -0.500000 |
| I    | -0.152251 | -0.500000 | 0.420653  |
| S    | -0.083933 | -0.500000 | -0.035895 |
| N    | -0.146114 | -0.354774 | -0.076985 |
| C    | 0.284018  | 0.082154  | -0.154761 |
| C    | 0.217589  | 0.163726  | -0.193453 |
| H    | 0.216374  | 0.288779  | -0.198324 |
| C    | 0.154414  | 0.082103  | -0.203832 |
| S    | 0.069526  | 0.177572  | -0.248721 |
| C    | 0.016670  | 0.000000  | -0.353448 |
| C    | -0.045242 | 0.000000  | -0.263611 |
| S    | -0.088612 | 0.170781  | -0.254585 |
| C    | -0.174918 | 0.079350  | -0.315575 |
| H    | -0.223356 | 0.154085  | -0.352317 |

**Optimized structure at 30 GPa (relaxed from 40 GPa structure).**

*Unit Cell Parameters:*

| Space Group | a (Å)    | b (Å)   | c (Å)   | $\beta$ (°) |
|-------------|----------|---------|---------|-------------|
| C2/m        | 18.85802 | 8.55946 | 5.79066 | 110.63711   |

*Fractional coordinates of the asymmetric unit:*

| Atom | x         | y         | z         |
|------|-----------|-----------|-----------|
| I    | 0.000000  | -0.500000 | -0.500000 |
| I    | -0.152040 | 0.500000  | 0.418115  |
| S    | -0.086190 | 0.500000  | -0.038271 |
| N    | -0.147514 | -0.356162 | -0.082579 |



|   |           |          |           |
|---|-----------|----------|-----------|
| C | 0.283384  | 0.081323 | -0.153845 |
| C | 0.217315  | 0.161748 | -0.192287 |
| H | 0.215947  | 0.285097 | -0.196848 |
| C | 0.154508  | 0.080994 | -0.204972 |
| S | 0.069901  | 0.174590 | -0.247449 |
| C | 0.016413  | 0.000000 | -0.354962 |
| C | -0.045961 | 0.000000 | -0.270961 |
| S | -0.088963 | 0.168255 | -0.258682 |
| C | -0.174224 | 0.077922 | -0.312965 |
| H | -0.222123 | 0.151365 | -0.346187 |

**Optimized structure at 20 GPa (relaxed from 30 GPa structure).**

*Unit Cell Parameters:*

| Space Group | a (Å)    | b (Å)   | c (Å)   | $\beta$ (°) |
|-------------|----------|---------|---------|-------------|
| C2/m        | 19.32882 | 8.78758 | 6.00657 | 111.50873   |

*Fractional coordinates of the asymmetric unit:*

| Atom | x         | y         | z         |
|------|-----------|-----------|-----------|
| I    | 0.000000  | 0.500000  | -0.500000 |
| I    | -0.154741 | -0.500000 | 0.412889  |
| S    | -0.091333 | -0.500000 | -0.048099 |
| N    | -0.150536 | -0.359215 | -0.089282 |
| C    | 0.281864  | 0.080032  | -0.153361 |
| C    | 0.216588  | 0.159072  | -0.191499 |
| H    | 0.215101  | 0.279882  | -0.198908 |
| C    | 0.154987  | 0.079825  | -0.207494 |
| S    | 0.071262  | 0.170840  | -0.252010 |
| C    | 0.017293  | 0.000000  | -0.353860 |
| C    | -0.042866 | 0.000000  | -0.268242 |
| S    | -0.086498 | 0.165118  | -0.258563 |
| C    | -0.170124 | 0.075868  | -0.306891 |
| H    | -0.217385 | 0.146637  | -0.335634 |

**Optimized structure at 10 GPa (relaxed from 20 GPa structure).**

*Unit Cell Parameters:*

| Space Group | a (Å)    | b (Å)   | c (Å)   | $\beta$ (°) |
|-------------|----------|---------|---------|-------------|
| C2/m        | 19.74299 | 9.10995 | 6.39733 | 112.28525   |

*Fractional coordinates of the asymmetric unit:*

| Atom | x         | y         | z         |
|------|-----------|-----------|-----------|
| I    | 0.000000  | 0.500000  | -0.500000 |
| I    | -0.152512 | -0.500000 | 0.411189  |
| S    | -0.094591 | -0.500000 | -0.049435 |

|   |           |           |           |
|---|-----------|-----------|-----------|
| N | -0.153054 | -0.362980 | -0.096241 |
| C | 0.280517  | 0.078061  | -0.154267 |
| C | 0.215655  | 0.155283  | -0.193583 |
| H | 0.214571  | 0.272662  | -0.196259 |
| C | 0.154673  | 0.077826  | -0.215883 |
| S | 0.071593  | 0.164902  | -0.255444 |
| C | 0.016753  | 0.000000  | -0.355782 |
| C | -0.043481 | 0.000000  | -0.281632 |
| S | -0.086264 | 0.160654  | -0.263145 |
| C | -0.167978 | 0.073012  | -0.296194 |
| H | -0.213954 | 0.142017  | -0.317267 |

**Optimized structure at 5 GPa (relaxed from 10 GPa structure).**

*Unit Cell Parameters:*

| Space Group | a (Å)    | b (Å)   | c (Å)   | $\beta$ (°) |
|-------------|----------|---------|---------|-------------|
| C2/m        | 20.13161 | 9.33707 | 6.65058 | 110.32576   |

*Fractional coordinates of the asymmetric unit:*

| Atom | x         | y         | z         |
|------|-----------|-----------|-----------|
| I    | 0.000000  | -0.500000 | 0.500000  |
| I    | -0.151962 | -0.500000 | 0.398555  |
| S    | -0.098698 | -0.500000 | -0.065009 |
| N    | -0.155670 | -0.365614 | -0.109141 |
| C    | 0.280127  | 0.076575  | -0.158261 |
| C    | 0.217051  | 0.152638  | -0.191594 |
| H    | 0.216693  | 0.267640  | -0.191141 |
| C    | 0.157642  | 0.076442  | -0.211115 |
| S    | 0.076126  | 0.160939  | -0.248566 |
| C    | 0.030145  | 0.000000  | -0.257861 |
| C    | -0.037378 | 0.000000  | -0.261623 |
| S    | -0.083938 | 0.159510  | -0.266021 |
| C    | -0.164397 | 0.071165  | -0.306558 |
| H    | -0.210140 | 0.138009  | -0.334229 |

**Optimized structure at ambient pressure (relaxed from 5 GPa structure).**

*Unit Cell Parameters:*

| Space Group | a (Å)    | b (Å)   | c (Å)   | $\beta$ (°) |
|-------------|----------|---------|---------|-------------|
| C2/m        | 21.19859 | 9.96882 | 7.20584 | 113.22584   |

*Fractional coordinates of the asymmetric unit:*

| Atom | x         | y         | z         |
|------|-----------|-----------|-----------|
| I    | 0.000000  | 0.500000  | -0.500000 |
| I    | -0.150000 | -0.500000 | 0.397749  |

|   |           |           |           |
|---|-----------|-----------|-----------|
| S | -0.115697 | -0.500000 | -0.079215 |
| N | -0.170092 | -0.373034 | -0.115949 |
| C | 0.268172  | 0.072235  | -0.154164 |
| C | 0.207293  | 0.143588  | -0.186313 |
| H | 0.205849  | 0.251652  | -0.190822 |
| C | 0.149878  | 0.071658  | -0.211263 |
| S | 0.070753  | 0.151659  | -0.252268 |
| C | 0.025637  | 0.000000  | -0.260535 |
| C | -0.038690 | 0.000000  | -0.262937 |
| S | -0.084587 | 0.150186  | -0.269201 |
| C | -0.157872 | 0.066590  | -0.270379 |
| H | -0.198618 | 0.128895  | -0.264805 |

## Band structure and total DOSs plots at variable pressure

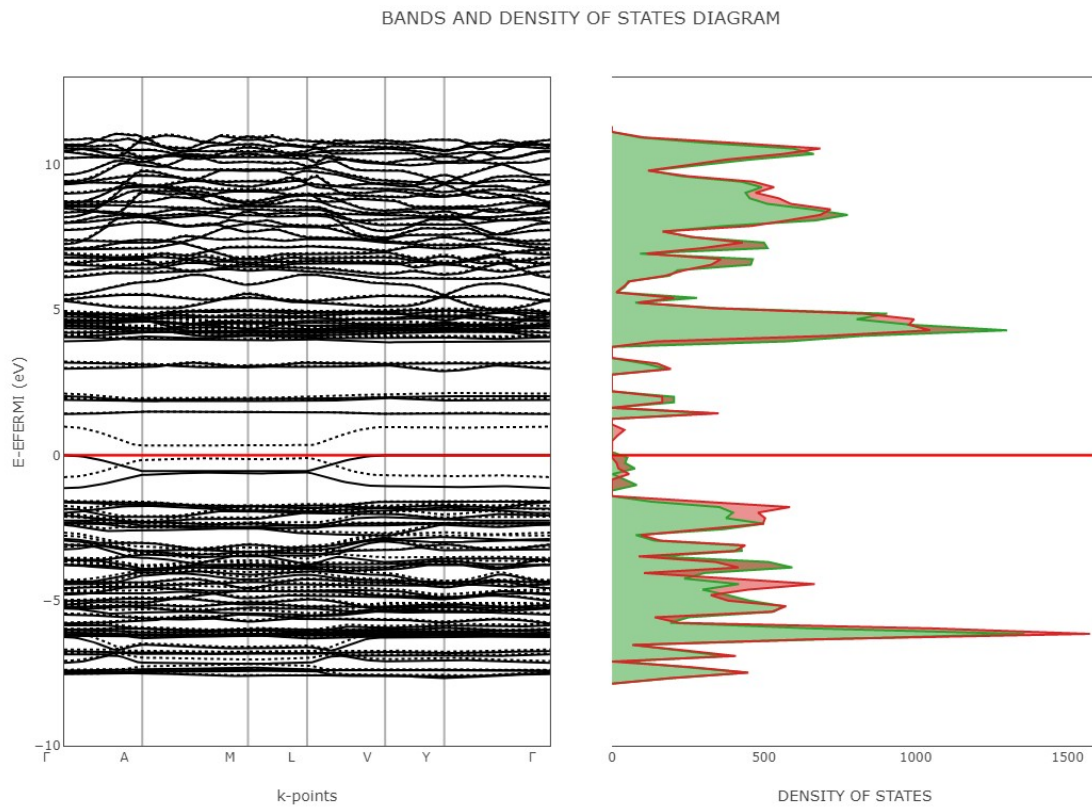

**Figure S1.** Band structure and Density of States plot for the optimized structure at ambient pressure.

Band Structure and Total DOS at 50 GPa

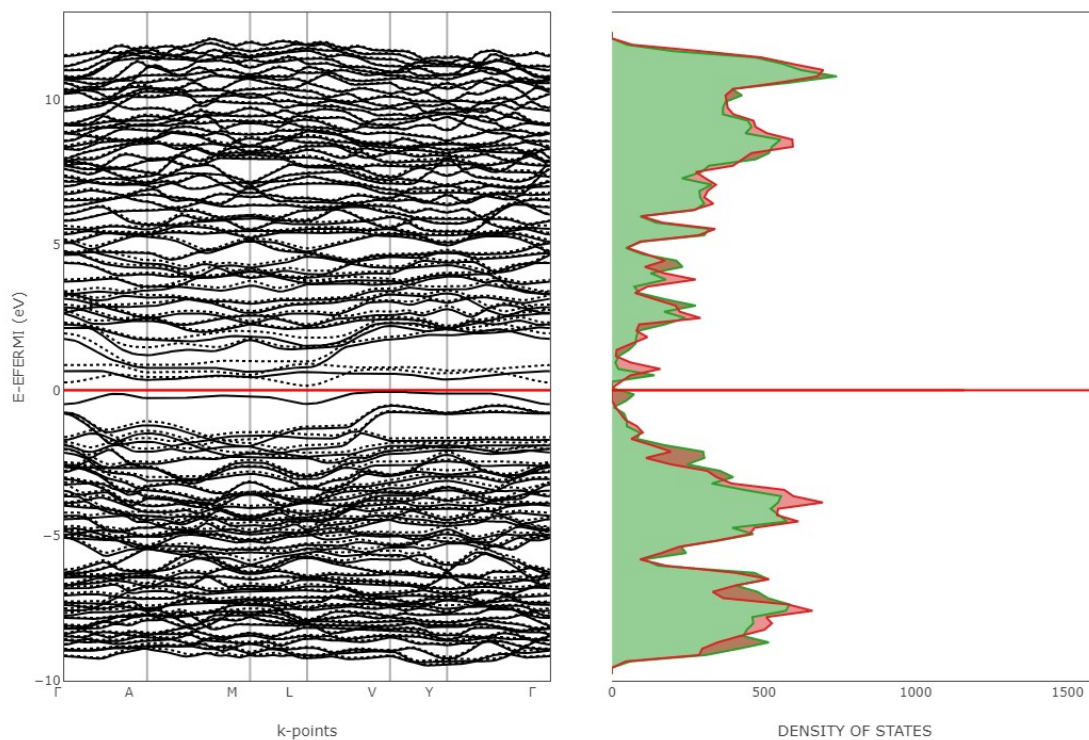

**Figure S2.** Band structure and Density of States plot for the optimized structure at 50 GPa.

Band Structure and Total DOS at 60 GPa

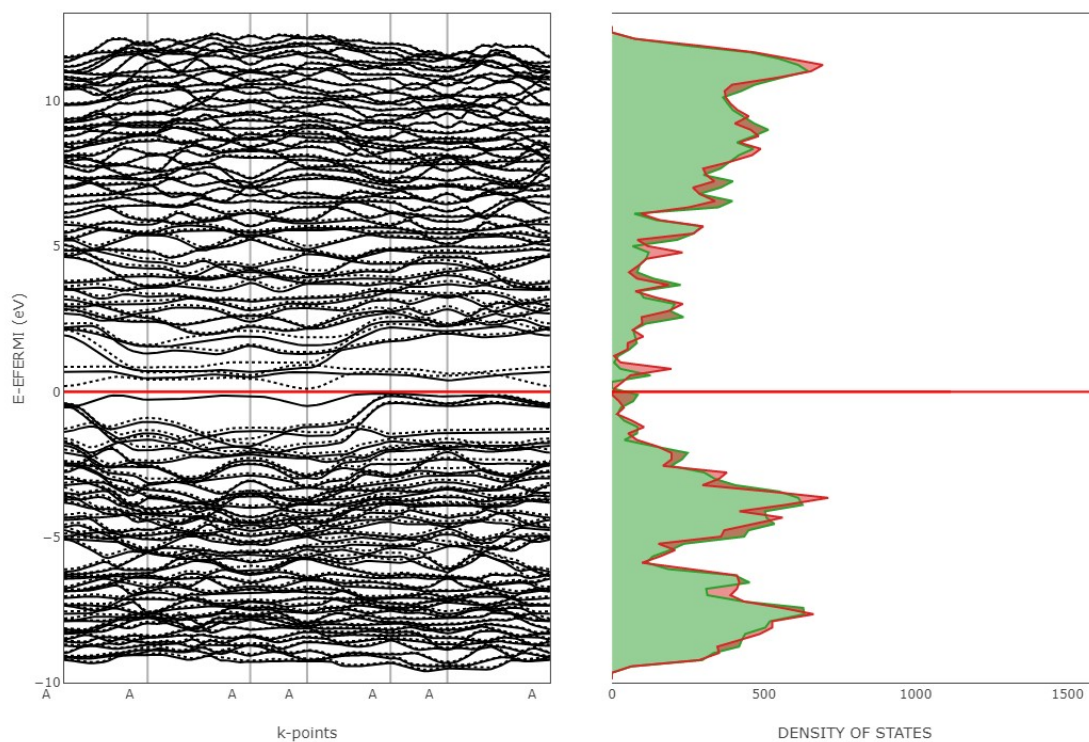

**Figure S3.** Band structure and Density of States plot for the optimized structure at 60 GPa.

## Forces calculated with semi-empirical potential

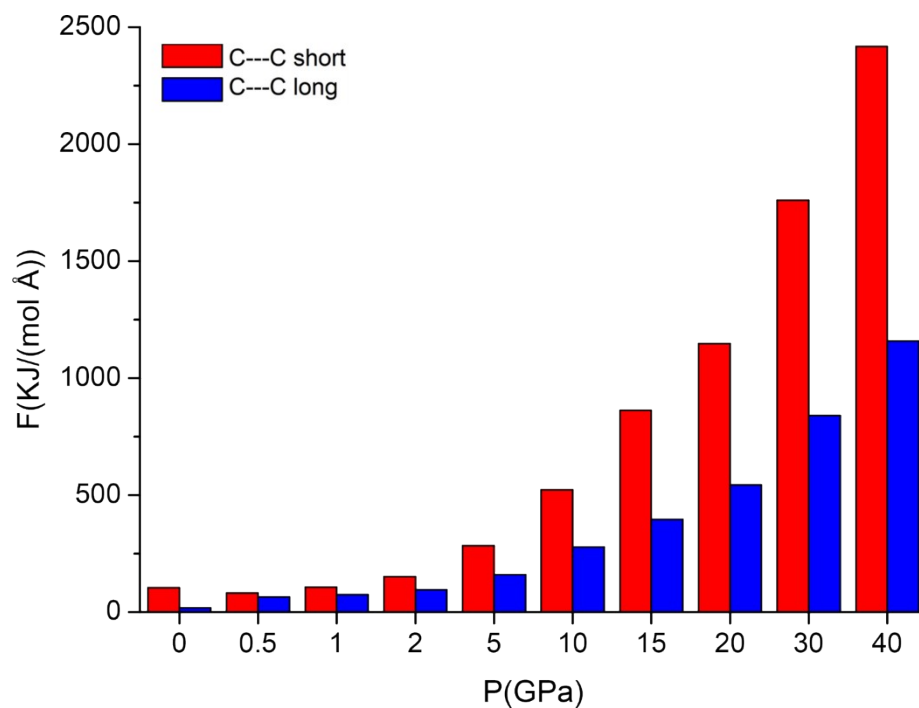

**Figure S4.** Intermolecular interaction forces computed with the semi-empirical potential FF on the calculated crystal structures of  $(\text{TTF-BTD})_2\text{I}_3$  up to 40 GPa for the molecules containing the  $\text{C}\cdots\text{C}_{\text{short}}$  and  $\text{C}\cdots\text{C}_{\text{long}}$  contacts.

## Raman spectra at variable temperature

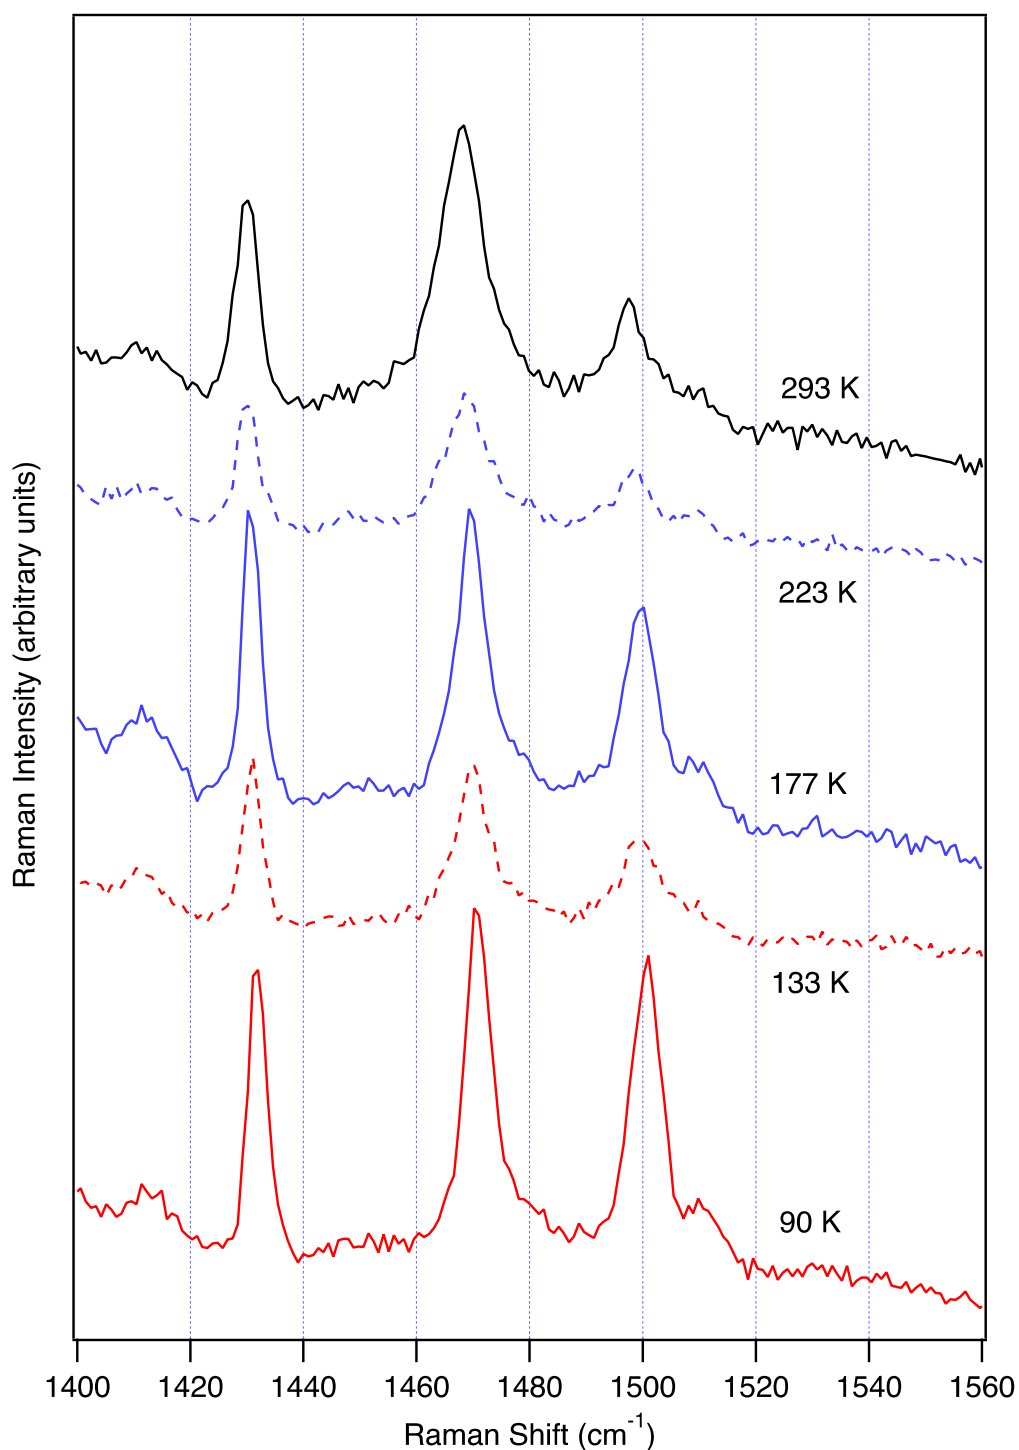

**Figure S5.** Raman spectra at variable temperature and ambient pressure in the region of C=C stretching modes shown in the same range as for variable pressure in Figure 4. Peaks broaden and maxima shift to slightly lower frequency with increasing temperature. Excitation wavelength: 785 nm.
